# Supplementary material for: Towards High Capacitive Performance of Chemically Deposited β-Ni(OH)2 Nanolamellae Electrode Films
Source: MDPI journal article supplement (doi:10.3390/mi14081644), 2023-08-20
Supplement: s1 [file s1]

## Supporting Information for

### Towards High Capacitive Performance of Chemically Deposited $\beta$ -Ni(OH)<sub>2</sub> Nanolamellae Electrode Films

Kevin Radakishna Moonooswamy<sup>1</sup>, and Mohammed Es-Souni<sup>2\*</sup>

<sup>1</sup>Currently with Toronto Metropolitan University, Victoria Street 350, Ontario, Canada

<sup>2</sup>Formerly with Kiel University of Applied Sciences, Grenzstrasse 3, Kiel 24149, Germany.

\* Correspondence: mohammed.es-souni@fh-kiel.de

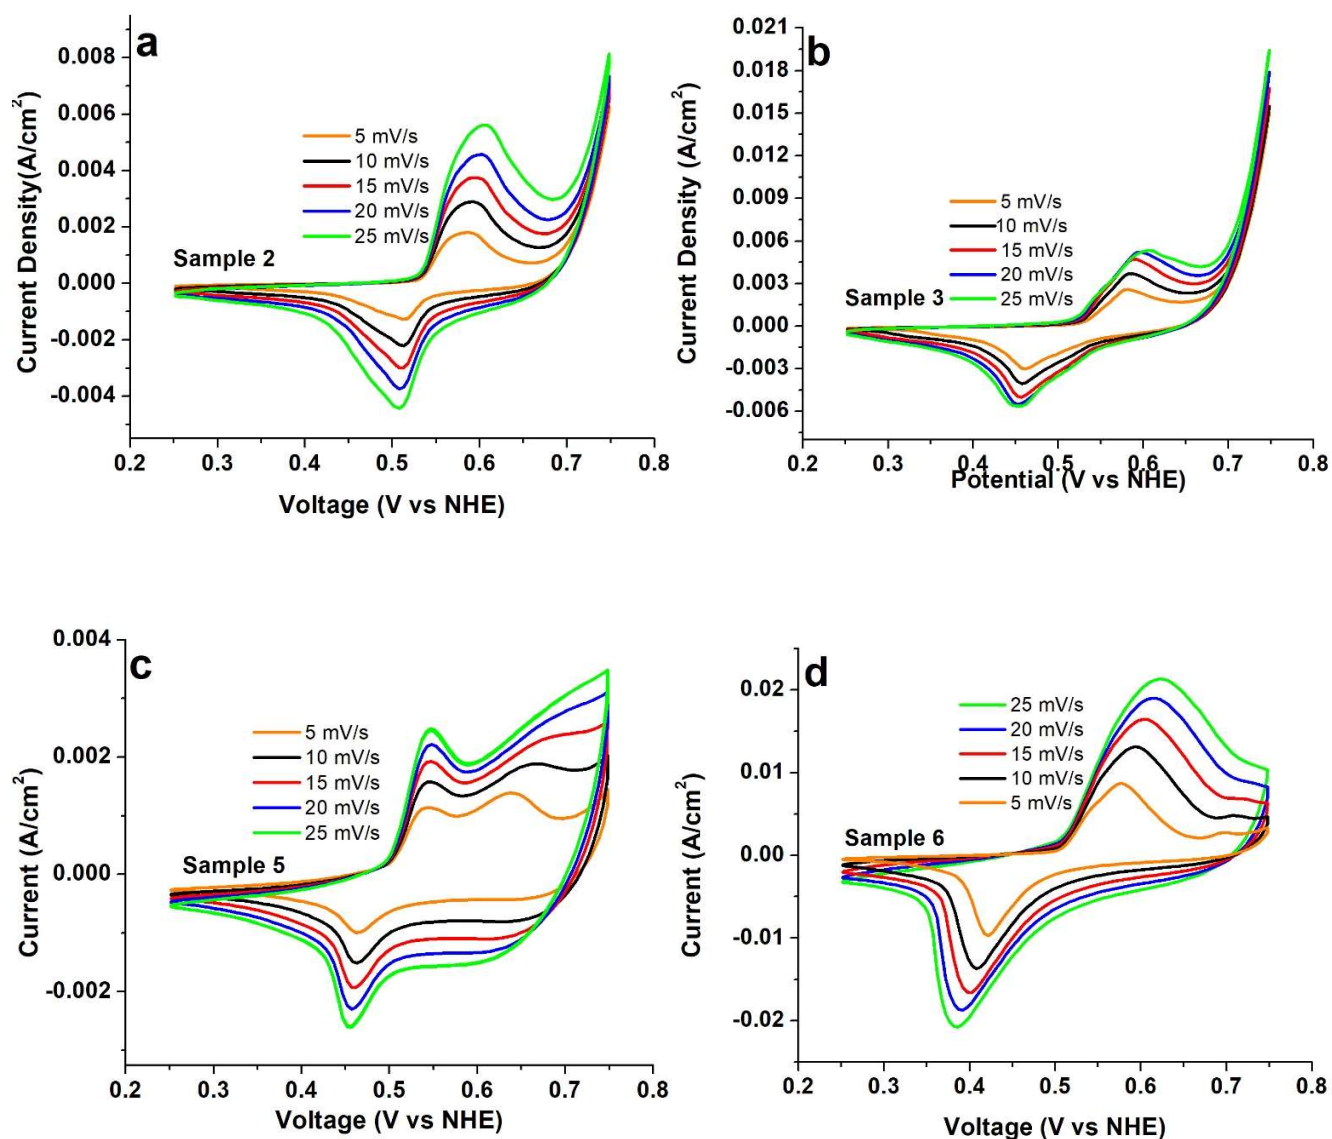

**Figure S1.** CV curves collected at different scan rates for (a) sample 2 made with lower ammonia content, (b) sample 3 made only in the presence of nickel chloride hexahydrate and ammonia, (c) sample 5 made with lower ammonia content similar to sample 2 but on a textured substrate and (d) sample 6 made only in the presence of nickel chloride hexahydrate and ammonia similar to sample 3 but on a textured substrate. The double peaks observed at lower scan rates in (c) is due to incomplete conditioning of the hierarchical structure at  $25 \text{ mVs}^{-1}$ .

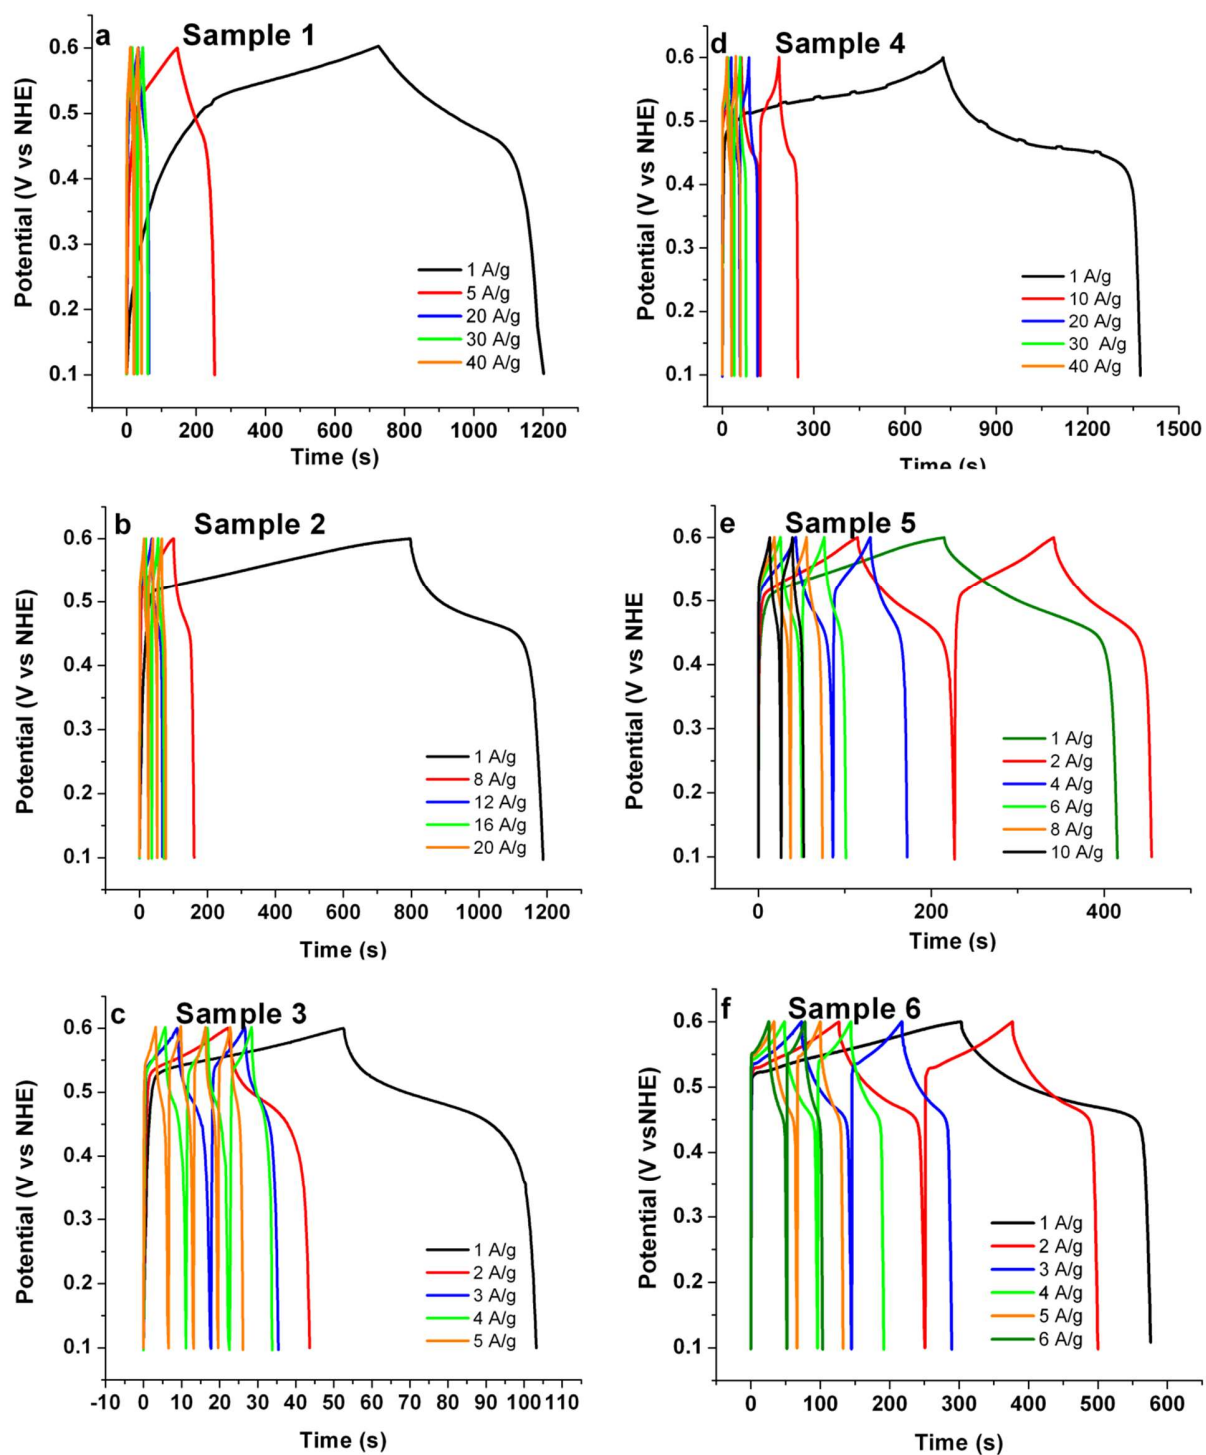

**Figure S2.** Charge/Discharge curves collected at different current density for (a) standard procedure  $\beta$ -Ni(OH)<sub>2</sub> sample 1, (b) sample 2 made with lower ammonia content, (c) sample 3 made only in the presence of nickel chloride hexahydrate and ammonia, (d) sample 4 made with similar standard procedure as sample 1 but on a textured substrate, (e) sample 5 made with lower ammonia content similar to sample 2 but on a textured substrate and (f) sample 6 made only in

the presence of nickel chloride hexahydrate and ammonia similar to sample 3 but on a textured substrate.
